# Supplementary material for: Isolation and Characterization of a Novel Hydrophobin, Sa-HFB1, with Antifungal Activity from an Alkaliphilic Fungus, Sodiomyces alkalinus
Source: MDPI journal article supplement (doi:10.3390/jof8070659), 2022-06-23
Supplement: s1 [file s1]

# Isolation and Characterization of a Novel Hydrophobin, Sa-HFB1, With Antifungal Activity From an Alkaliphilic Fungus, *Sodiomyces alkalinus*

Anastasia E. Kuvarina<sup>1</sup>, Eugene A. Rogozhin<sup>1,2</sup>, Maxim A. Sykonnikov<sup>1</sup>, Alla V. Timofeeva<sup>3</sup>, Marina V. Serebryakova<sup>3</sup>, Natalia V. Fedorova<sup>3</sup>, Lyudmila Y. Kokaeva<sup>4</sup>, Tatiana A. Efimenko<sup>1</sup>, Marina L. Georgieva<sup>1,4</sup> and Vera S. Sadykova<sup>1\*</sup>

## Supplementary

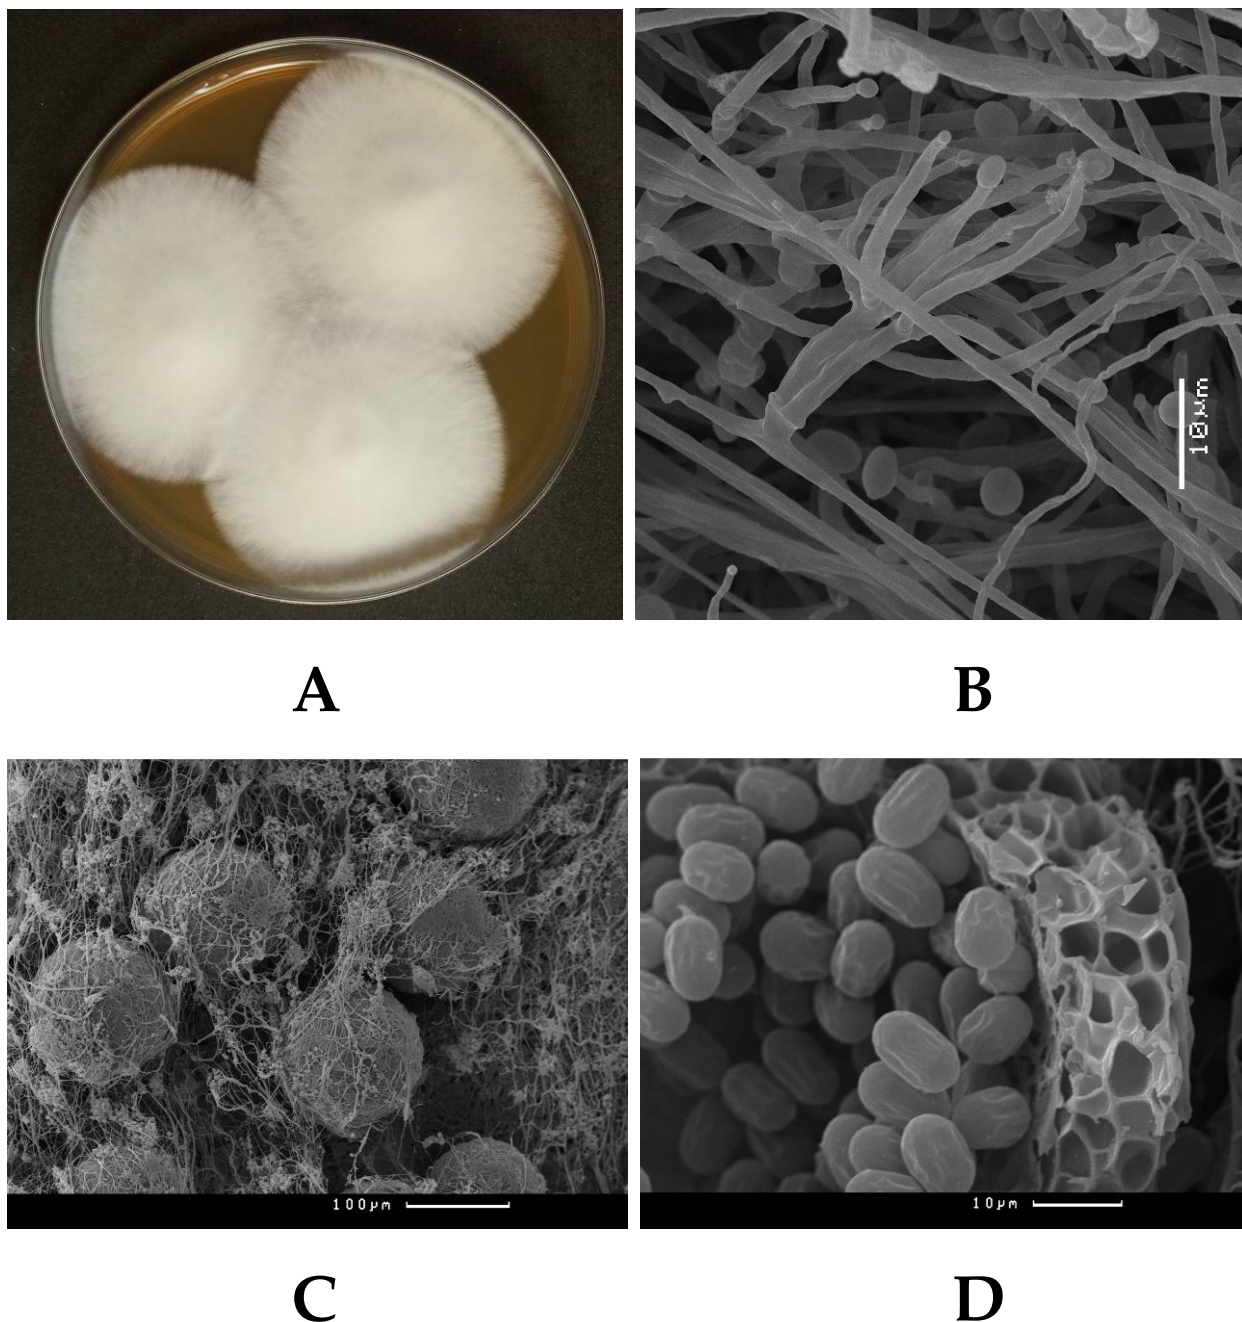

**Figure S1.** *Sodiomyces alkalinus* Grum-Grzhimaylo, Debets & Bilanenko: A – growth on the alkaline agar medium; B – D scanning electron microscopy: B - conidiophores with 3-5 branches and conidia; C -

clialothecial ascomata, creeping vegetative hyphae and conidiophores with slimy mass of abundant conidia; D - ascospores and multilayered peridium of ascomata.

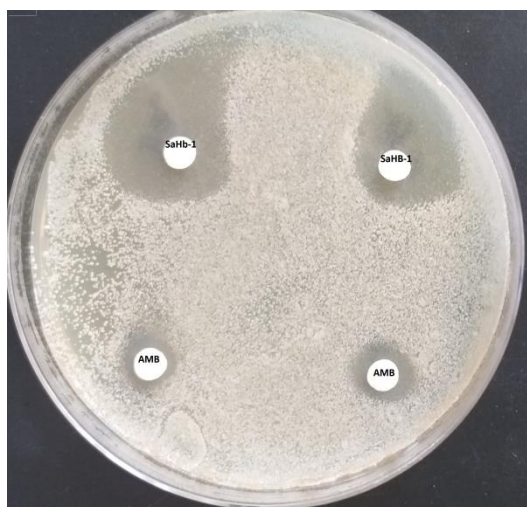

A

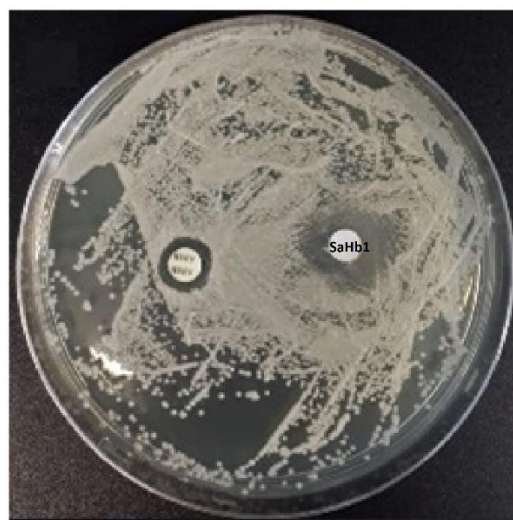

B

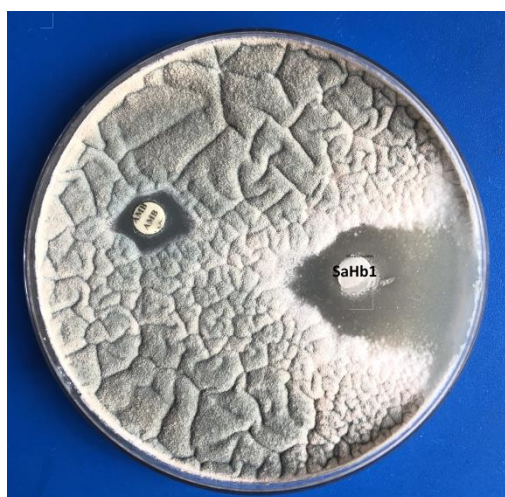

C

**Figure S2.** Activity of Sa-HFB1 against pathogenic clinical isolates of *Cryptococcus neoformans* 297m (A) *Candida albicans* 1582m (B) and *Aspergillus fumigatus*.

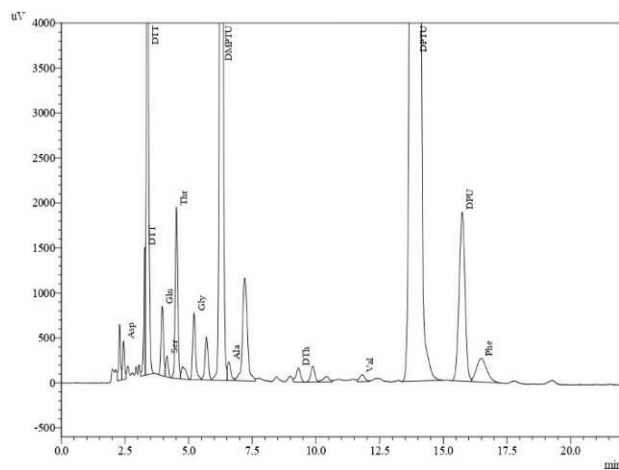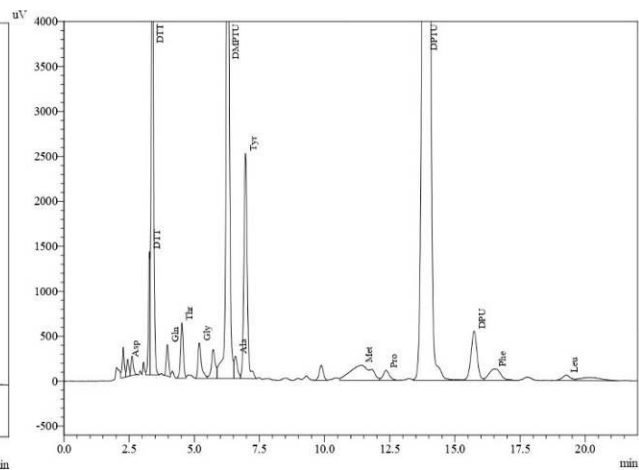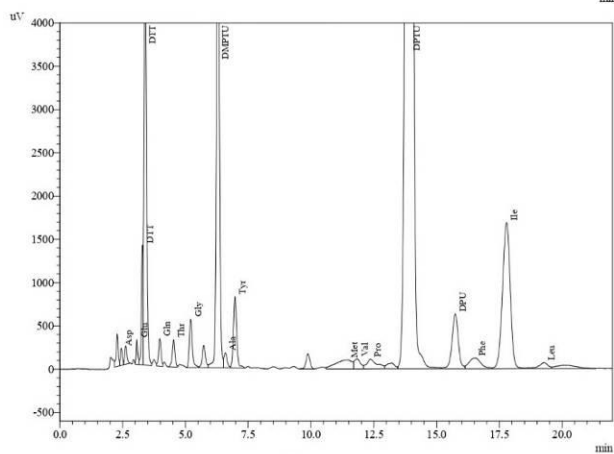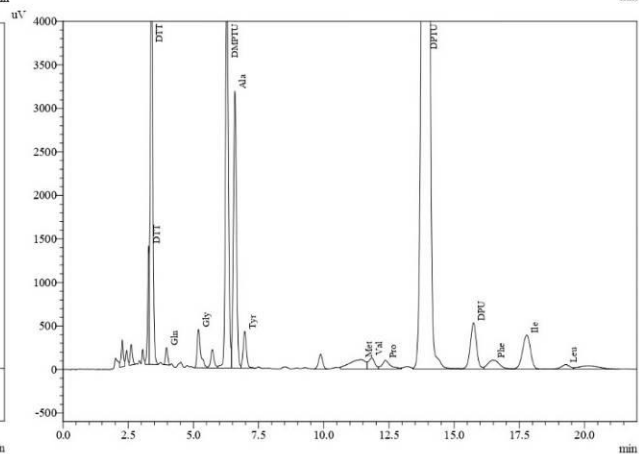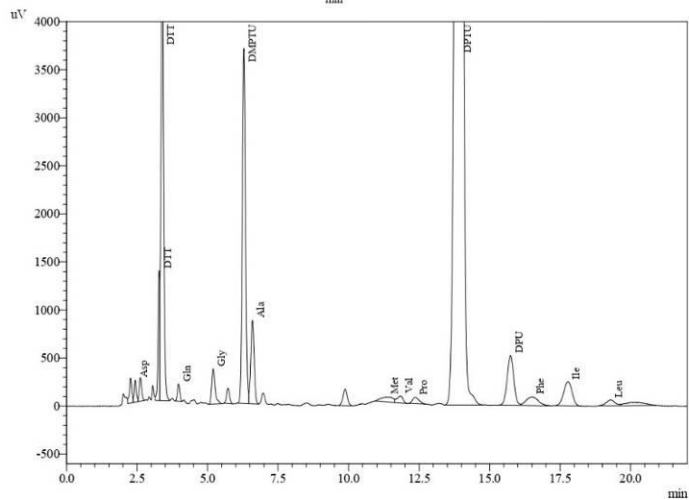

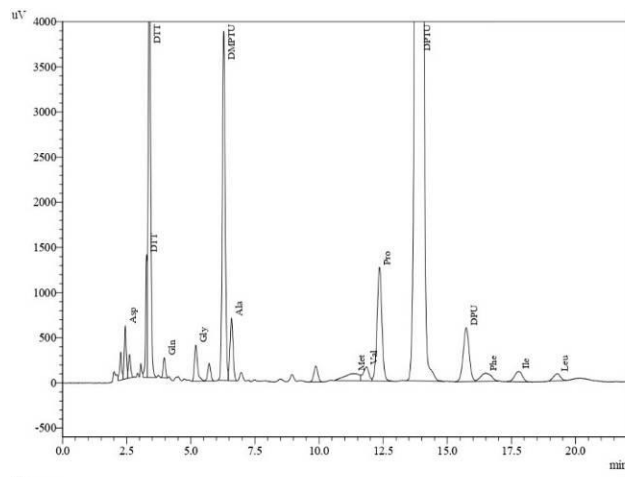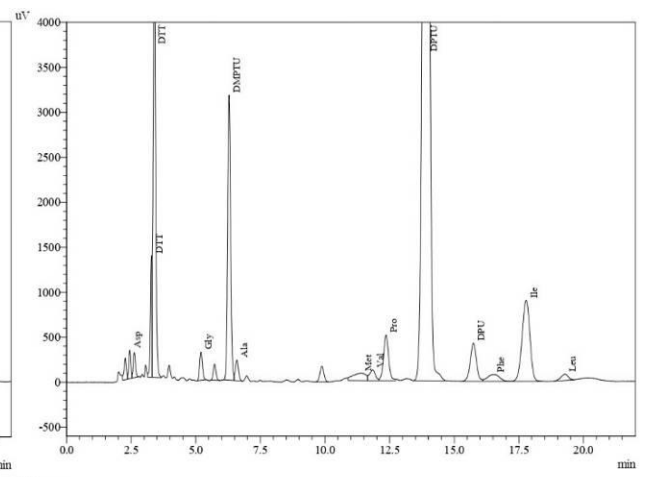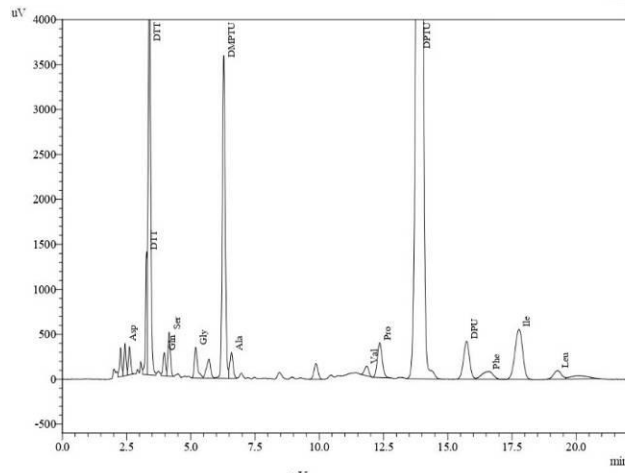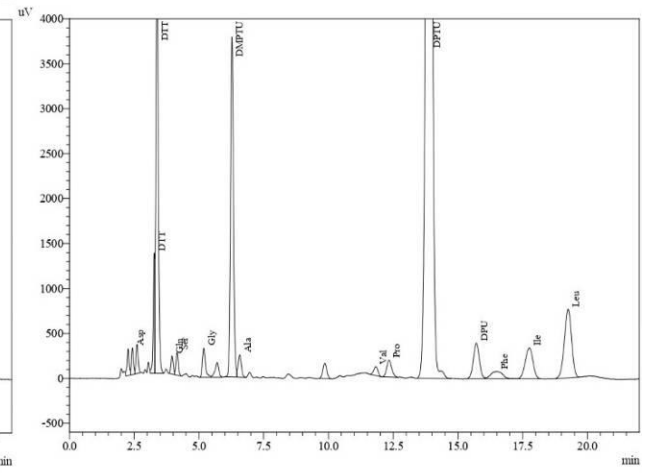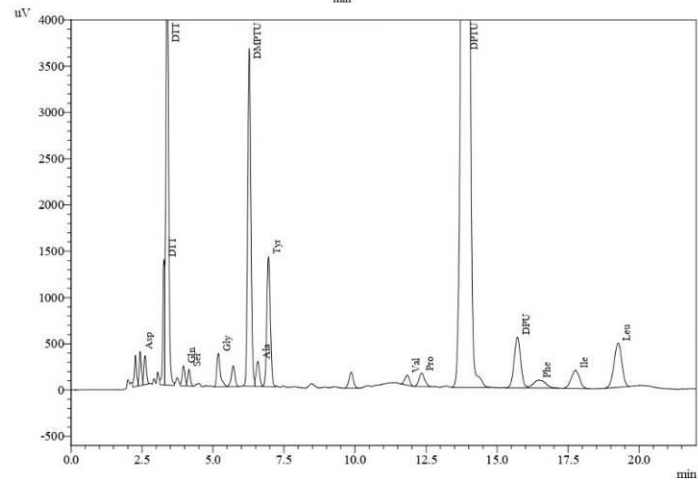

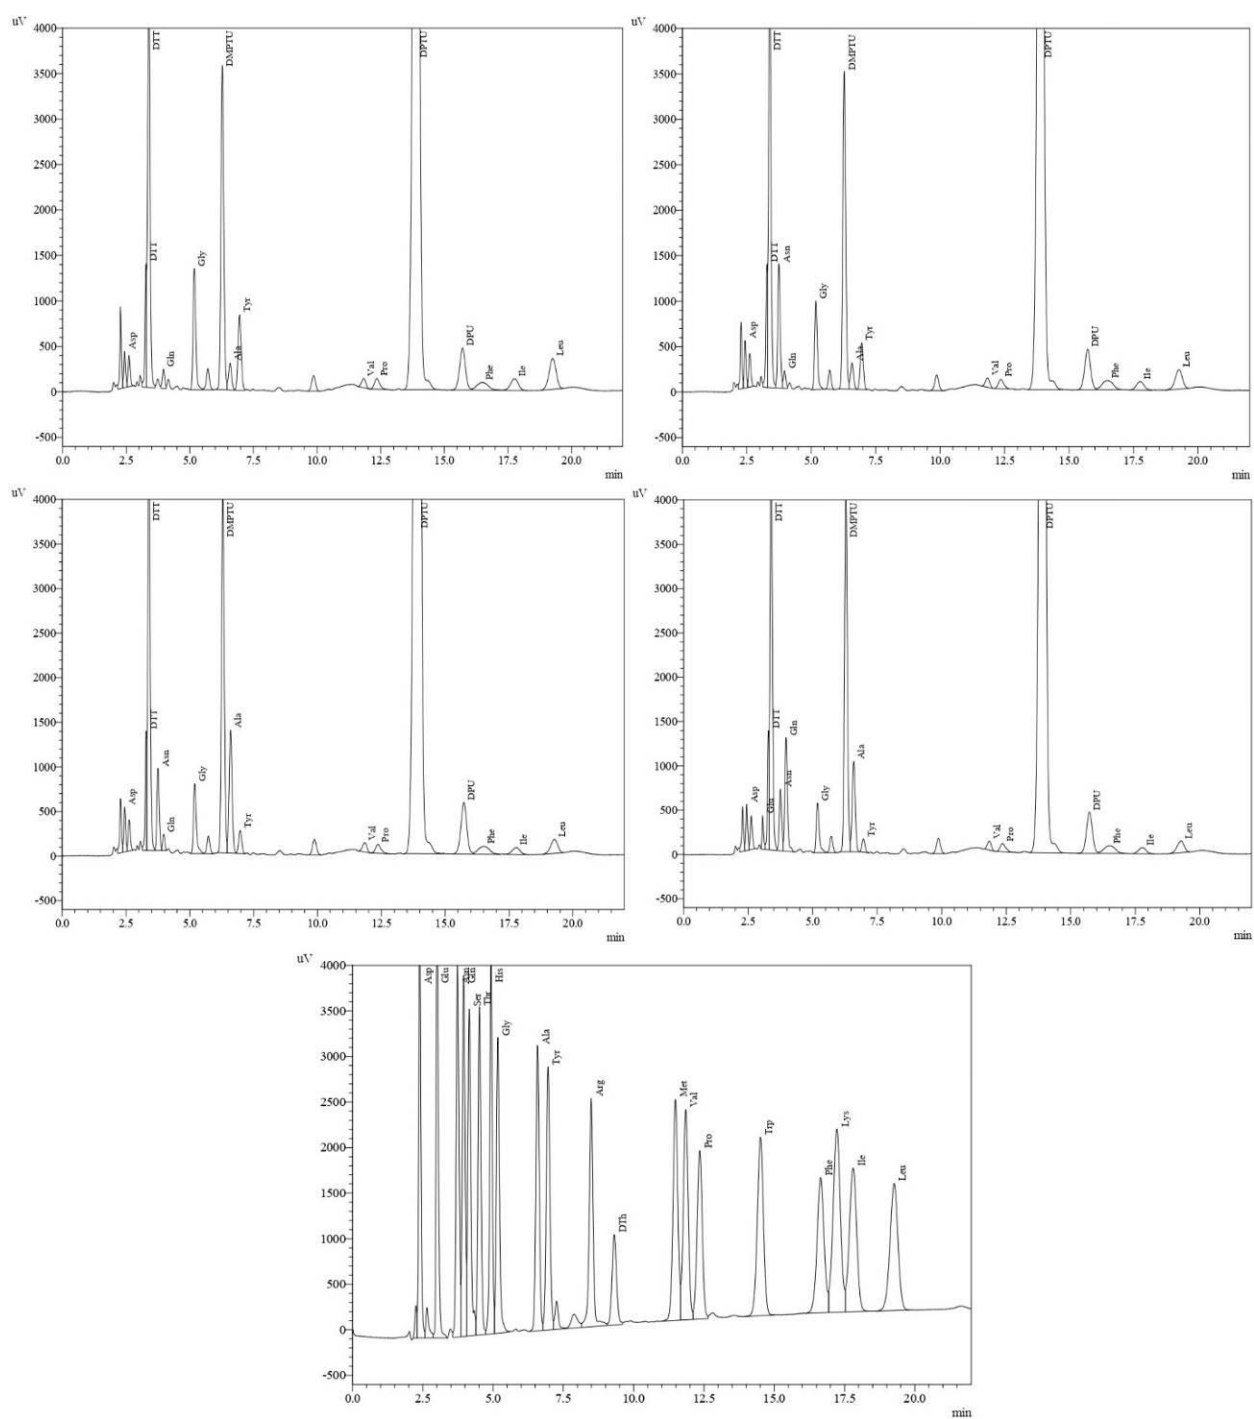

**Figure S3.** Chromatograms of PTH derivatives of amino acids in N-terminal automated sequencing.

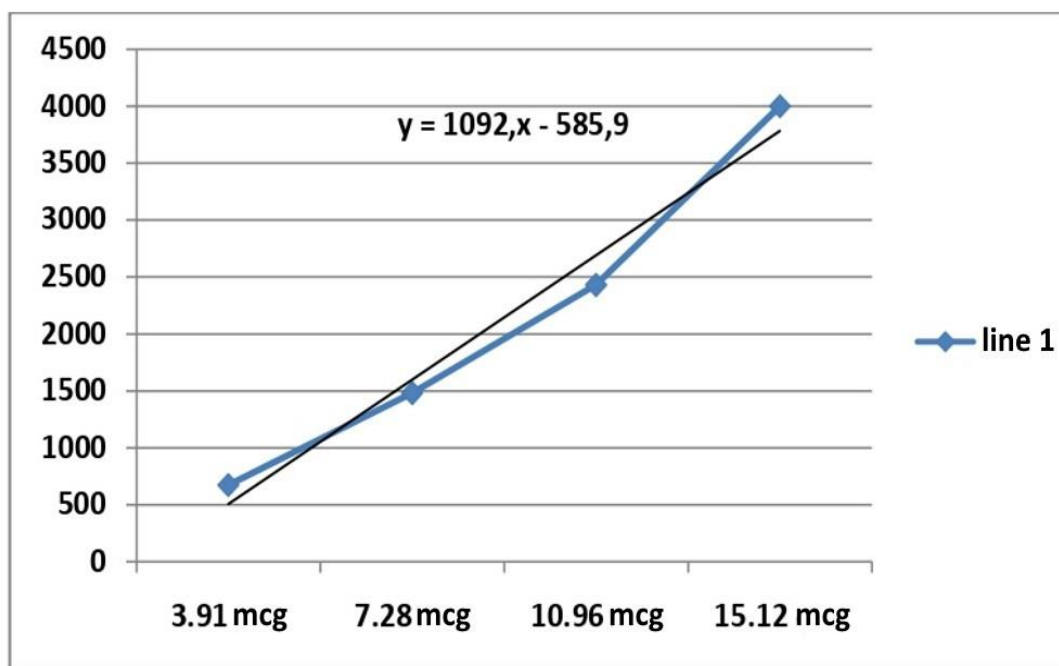

Figure S4. Hydrophobin HPLC calibration.
